# Supplementary material for: DNA metabarcoding analysis of three material types to reveal Joro spider (Trichonephila clavata) trophic interactions and web capture
Source: Frontiers journal article supplement (doi:10.3389/fevo.2023.1177446), 2023-07-18
Supplement: Table_1.xlsx [file Table_1.xlsx]

## Sheet: Sheet1
Class	Order	Family	Prey remain reads	Fecal reads	Gut content reads
Arachnida	Araneae	Araneidae	50532		78
Arachnida	Araneae	Clubionidae	796
Arachnida	Araneae	Linyphiidae	234
Arachnida	Araneae	Lycosidae	2373
Arachnida	Araneae	Philodromidae	484
Arachnida	Araneae	Pholcidae	19
Arachnida	Araneae	Salticidae	67
Arachnida	Araneae	Theridiidae	5947	12964	24
Arachnida	Mesostigmata	Melicharidae	83
Arachnida	Sarcoptiformes	Cymbaeremaeidae	1793
Arachnida	Sarcoptiformes	Nothridae	209
Arachnida	Sarcoptiformes	Oribatellidae	119
Arachnida	Sarcoptiformes	Oribatulidae	403
Arachnida	Sarcoptiformes	Oripodidae	4216
Arachnida	Sarcoptiformes	Tectocepheidae	6879
Arachnida	Trombidiformes	Anystidae	30
Arachnida	Trombidiformes	Eriophyidae	539
Arachnida	Trombidiformes	Eupodidae	273
Arachnida	Trombidiformes	Tarsonemidae	10090
Insecta	Blattodea	Blattidae		927
Collembola	Entomobryomorpha	Entomobryidae	83
Collembola	Entomobryomorpha	Isotomidae	42
Diplopoda	Polydesmida	Paradoxosomatidae	230
Insecta	Coleoptera	Bolboceratidae	21242
Insecta	Coleoptera	Cantharidae	45
Insecta	Coleoptera	Carabidae	5041	181	14
Insecta	Coleoptera	Chrysomelidae	1215		251
Insecta	Coleoptera	Ciidae			95
Insecta	Coleoptera	Coccinellidae	14244	307
Insecta	Coleoptera	Curculionidae	295		7874
Insecta	Coleoptera	Elateridae	826
Insecta	Coleoptera	Geotrupidae	4389		5018
Insecta	Coleoptera	Hydrophilidae			11
Insecta	Coleoptera	Ptiliidae	27
Insecta	Coleoptera	Scarabaeidae	24368
Insecta	Coleoptera	Silvanidae	108
Insecta	Coleoptera	Staphylinidae	24109	1074	1545
Insecta	Diptera	Acartophthalmidae	4919
Insecta	Diptera	Anthomyiidae	71
Insecta	Diptera	Anthomyzidae	222	23
Insecta	Diptera	Anisopodidae			78
Insecta	Diptera	Asilidae	1798	25
Insecta	Diptera	Calliphoridae	15425		13
Insecta	Diptera	Cecidomyiidae	153166	788
Insecta	Diptera	Ceratopogonidae	75548	739
Insecta	Diptera	Chaoboridae	5103
Insecta	Diptera	Chironomidae	334145	15472	40
Insecta	Diptera	Chloropidae	38508	200
Insecta	Diptera	Culicidae	520	17151
Insecta	Diptera	Dolichopodidae	929	1436	22
Insecta	Diptera	Drosophilidae	4510	525	249
Insecta	Diptera	Ephydridae	1029
Insecta	Diptera	Hybotidae	13242
Insecta	Diptera	Keroplatidae	1002
Insecta	Diptera	Lauxaniidae			101
Insecta	Diptera	Limoniidae	459	168
Insecta	Diptera	Lonchaeidae	10637		396
Insecta	Diptera	Milichiidae	39
Insecta	Diptera	Muscidae	27874	2687	28
Insecta	Diptera	Mycetophilidae	342
Insecta	Diptera	Pediciidae	212
Insecta	Diptera	Phoridae	8719	464
Insecta	Diptera	Psychodidae	2790
Insecta	Diptera	Sarcophagidae	7284	13
Insecta	Diptera	Scatopsidae	1061	7683
Insecta	Diptera	Sciaridae	85533	1029	21
Insecta	Diptera	Sciomyzidae		2317	30
Insecta	Diptera	Sepsidae	1226	1291	13
Insecta	Diptera	Simuliidae	8809
Insecta	Diptera	Sphaeroceridae	17737	423	38
Insecta	Diptera	Syrphidae	15381		288
Insecta	Diptera	Tachinidae	19980	2916	66
Insecta	Diptera	Tephritidae	82
Insecta	Diptera	Tipulidae	946
Insecta	Hemiptera	Acanaloniidae		669	14
Insecta	Hemiptera	Aleyrodidae	165
Insecta	Hemiptera	Alydidae	1406
Insecta	Hemiptera	Anoeciidae	210
Insecta	Hemiptera	Aphididae	93699	937	31
Insecta	Hemiptera	Aphrophoridae	57395	483	42
Insecta	Hemiptera	Cercopidae	54
Insecta	Hemiptera	Cicadellidae	5030	416	186
Insecta	Hemiptera	Clastopteridae			114
Insecta	Hemiptera	Coreidae	562
Insecta	Hemiptera	Cydnidae	5907
Insecta	Hemiptera	Flatidae	10859
Insecta	Hemiptera	Hormaphididae	16605
Insecta	Hemiptera	Membracidae	38
Insecta	Hemiptera	Miridae	201		1620
Insecta	Hemiptera	Nabidae			26
Insecta	Hemiptera	Pemphigidae	111222	1637	47
Insecta	Hemiptera	Pentatomidae	28351	68
Insecta	Hemiptera	Phylloxeridae	15
Insecta	Hemiptera	Plataspidae	449
Insecta	Hemiptera	Rhyparochromidae	397	386
Insecta	Hemiptera	Scutelleridae	7177
Insecta	Hymenoptera	Agaonidae	29
Insecta	Hymenoptera	Aphelinidae	12028
Insecta	Hymenoptera	Apidae	29
Insecta	Hymenoptera	Braconidae	1224	313
Insecta	Hymenoptera	Eulophidae	707
Insecta	Hymenoptera	Eurytomidae	530
Insecta	Hymenoptera	Formicidae	14
Insecta	Hymenoptera	Ichneumonidae	3830	26637	134
Insecta	Hymenoptera	Mymaridae	8539
Insecta	Hymenoptera	Platygastridae	2471
Insecta	Hymenoptera	Pompilidae	4800
Insecta	Hymenoptera	Pteromalidae	488
Insecta	Hymenoptera	Scelionidae	34
Insecta	Hymenoptera	Vespidae	26905	427
Insecta	Lepidoptera	Bucculatricidae		368
Insecta	Lepidoptera	Coleophoridae	77
Insecta	Lepidoptera	Erebidae	614	2907	32
Insecta	Lepidoptera	Gelechiidae	106	12
Insecta	Lepidoptera	Geometridae	40045	43
Insecta	Lepidoptera	Glyphidoceridae		83
Insecta	Lepidoptera	Heliozelidae	15
Insecta	Lepidoptera	Hesperiidae	234		12
Insecta	Lepidoptera	Lasiocampidae		207
Insecta	Lepidoptera	Limacodidae		9202
Insecta	Lepidoptera	Noctuidae	46262	1519	15
Insecta	Lepidoptera	Notodontidae	791
Insecta	Lepidoptera	Nymphalidae		1329
Insecta	Lepidoptera	Pyralidae	682	10
Insecta	Lepidoptera	Sesiidae	2520	12
Insecta	Lepidoptera	Yponomeutidae			35
Insecta	Neuroptera	Chrysopidae	11
Insecta	Orthoptera	Gryllidae	860	324
Insecta	Orthoptera	Mogoplistidae	70
Insecta	Plecoptera	Eustheniidae	5180
Insecta	Psocoptera	Amphipsocidae	7465	22
Insecta	Psocoptera	Caeciliusidae	530
Insecta	Psocoptera	Peripsocidae	16575	1192
Insecta	Psocoptera	Philotarsidae	109
Insecta	Psocoptera	Psocidae	2571	1437	19
Collembola	Entomobryomorpha	Paronellidae		70
Insecta	Thysanoptera	Phlaeothripidae	34
Insecta	Trichoptera	Polycentropodidae	38
		Total reads	1566757	121513	18620
